# Supplementary material
Source: publisher site journal article supplement (https://www.dovepress.com/article/506431)
Supplement: Supplementary file 1 [file 506431%20Revised%20Supplementary%20Table.docx]

**Supplementary Table 1.** Baseline characteristics of 877 Chinese participants by ages.

| Value | Age | | P value | X2 values , degrees of freedom |
| --- | --- | --- | --- | --- |
| Middle age, n=399  (Age<65) | Older age, n=478  (Age≥65) |
| **Sociodemographic** |  |  |  |  |
| Male, % | 251 (44.0%) | 319 (56.0%) | 0.266 | 1.4015, 1 |
| BMI (>23.9 kg/m²),% | 226 (50.3%) | 223 (49.7%) | 0.00341 | 8.9855, 1 |
| **Lifestyle risk factors** |  |  |  |  |
| **Current drink, %** |  |  | 0.162 | 2.2399, 1 |
| No | 326 (44.8%) | 402 (55.2%) |  |  |
| Yes | 65 (52.0%) | 60 (48%) |  |  |
| **Current smoke, %** |  |  | 0.236 | 2.8895, 2 |
| No | 189 (44.2%) | 239 (55.8%) |  |  |
| Quit smoking | 109 (43.6%) | 141 (56.4%) |  |  |
| Yes | 101 (50.8%) | 98 (49.2%) |  |  |
| **Seafood intake, %** |  |  | 0.00925 | 9.3667, 2 |
| ≤1 time per week | 84 (40.6%) | 123 (59.4%) |  |  |
| 2-6 times per week | 100 (25.1%) | 147 (30.8%) |  |  |
| ≥7 times per week | 215 (40.5%) | 208 (59.5%) |  |  |
| **Milk intake, %** |  |  | 0.043 | 6.2951, 2 |
| ≤1 time per week | 356 (46.7%) | 407 (53.3%) |  |  |
| 2-6 times per week | 32 (42.7%) | 43 (57.3%) |  |  |
| ≥7 times per week | 10 (26.3%) | 28 (73.7%) |  |  |
| **Clinical assessments** |  |  |  |  |
| Hypertension, % | 211 (39.3%) | 326 (60.7%) | <0.001 | 21.962, 1 |
| Diabetes mellitus, % | 99 (43.4%) | 129 (56.6%) | 0.493 | 0.58225, 1 |
| CHD, % | 208 (37.7%) | 344 (62.3%) | <0.001 | 36.686, 1 |
| **Insomnia, %** | 115 (47.5%) | 127 (52.5%) | 0.504 | 0.5525, 1 |
| **Medication factors** |  |  |  |  |
| Anti-hypertensive drugs, % | 243 (41.3%) | 345 (58.7%) | <0.001 | 12.51, 1 |
| Hypoglycemic drugs, % | 92 (43.2%) | 121 (56.8%) | 0.486 | 0.602, 1 |

Note. Variables using percentages were reported as the chi square test between low, moderate and high intake of soy products.

**Supplementary Table 2.** Baseline characteristics of 877 Chinese participants by ages.

| Value | Age | | P value | Z values |
| --- | --- | --- | --- | --- |
| Middle age, n=399  (Age<65)  mean (SD), median (IQR) | Older age, n=478  (Age≥65)  mean (SD), median (IQR) |
| **Lipid, mmol/L** |  |  |  |  |
| TG | 1.88 (1.35),  1.55 (13.5) | 1.57 (0.855),  1.37(6.34) | <0.001 | 16.94 |
| TC | 4.56 (1.26),  4.54 (14.84) | 13.2 (184),  4.16 (4017.89) | 0.00142 | 10.18 |
| LDL-C | 3.06 (0.869),  3.04 (5) | 2.90 (0.884),  2.80 (5.39) | 0.00258 | 9.08 |
| HDL-C | 1.07 (0.274),  1.02 (1.98) | 1.05 (0.261),  1.02 (1.64) | 0.332 | 0332 |
| **Inflammatory markers, pg/ml** |  |  |  |  |
| IL-1β | 8.10 (20.0),  3.61 (218.842) | 13.5 (35.8),  3.80 (279.892) | 0.138 | 2.21 |
| IL-2 | 7.22 (18.0),  4.68 (270.3) | 8.02 (20.2),  4.58 (277.61) | 0.697 | 0.15 |
| IL-6 | 37.1 (56.8),  24.0 (604.99) | 41.6 (58.7),  28.2 (817.47) | <0.001 | 11.96 |
| TNFα | 40.2 (75.0),  24.2 (998.38) | 54.7 (124),  26.3 (1188.52) | 0.192 | 1.7 |
| **ISI scores** | 5.54 (5.43),  4.00 (28) | 5.33 (4.87),  4.00 (23) | 0.874 | 0.03 |

Note. All data were reported as mean ± SD using Mann–Whitney sum tests and median with IQR.

**Supplementary Table 3.** Baseline characteristics of 877 Chinese participants by gender.

| Value | Gender | | P value | X2 values , degrees of freedom |
| --- | --- | --- | --- | --- |
| Male, n=570 | Female, n=307 |
| **Sociodemographic** |  |  |  |  |
| Age (≥65), % | 319 (66.7%) | 159 (33.3%) | 0.266 | 1.4015, 1 |
| BMI (>23.9 kg/m²),% | 287 (63.9%) | 162 (36.1%) | 0.429 | 0.74463, 1 |
| **Lifestyle risk factors** |  |  |  |  |
| **Current drink, %** |  |  | <0.001 | 75.193, 1 |
| No | 423 (58.1%) | 305 (41.9%) |  |  |
| Yes | 123 (98.4%) | 2 (1.6%) |  |  |
| **Current smoke, %** |  |  | <0.001 | 434.49, 2 |
| No | 131 (30.6%) | 297 (69.4%) |  |  |
| Quit smoking | 245 (98.0%) | 5 (2.0%) |  |  |
| Yes | 194 (97.5%) | 5 (2.5%) |  |  |
| **Seafood intake, %** |  |  | <0.001 | 18.339, 2 |
| ≤1 time per week | 111 (53.6%) | 96 (46.4%) |  |  |
| 2-6 times per week | 159 (64.4%) | 88 (35.6%) |  |  |
| ≥7 times per week | 300 (70.9%) | 123 (29.1%) |  |  |
| **Milk intake, %** |  |  | 0.0382 | 6.5273, 2 |
| ≤1 time per week | 488 (64.0%) | 275 (36.0%) |  |  |
| 2-6 times per week | 49 (65.3%) | 26 (34.7%) |  |  |
| ≥7 times per week | 32 (84.2%) | 6 (15.8%) |  |  |
| **Clinical assessments** |  |  |  |  |
| Hypertension, % | 336 (62.6%) | 201 (37.4%) | 0.0556 | 3.9528, 1 |
| Diabetes mellitus, % | 141 (61.8%) | 87 (38.2%) | 0.268 | 1.4149, 1 |
| CHD, % | 403 (73.0%) | 149 (27.0%) | <0.001 | 42.036, 1 |
| **Insomnia, %** | 123 (50.8%) | 119 (49.2%) | <0.001 | 29.487, 1 |
| **Medication factors** |  |  |  |  |
| Anti-hypertensive drugs, % | 375 (67.2%) | 213 (32.8%) | 0.315 | 1.165, 1 |
| Hypoglycemic drugs, % | 127 (59.6%) | 86 (40.4%) | 0.071 | 3.5656, 1 |

Note. Variables using percentages were reported as the chi square test between low, moderate and high intake of soy products.

**Supplementary Table 4.** Baseline characteristics of 877 Chinese participants by gender.

| Value | Gender | | P value | Z values |
| --- | --- | --- | --- | --- |
| Male, n=570  mean (SD), median (IQR) | Female, n=307  mean (SD), median (IQR) |
| **Lipid, mmol/L** |  |  |  |  |
| TG | 1.68 (1.11),  1.39 (13.6) | 1.79 (1.13),  1.53 (12.4) | 0.021 | 5.33 |
| TC | 11.7 (169),  4.18 (4017.89) | 4.70 (1.17),  4.66 (6.17) | <0.001 | 26.21 |
| LDL-C | 2.87 (0.848),  2.79 (5.55) | 3.16 (0.909),  3.13 (4.84) | <0.001 | 20.95 |
| HDL-C | 1.02 (0.266),  0.980 (2.02) | 1.11 (0.259),  1.08 (1.5) | <0.001 | 31.22 |
| **Inflammatory markers, pg/ml** |  |  |  |  |
| IL-1β | 10.9 (30.2),  3.56 (279.892) | 11.3 (29.1),  3.91 (235.842) | 0.179 | 1.81 |
| IL-2 | 6.66 (8.57),  4.71 (124.51) | 9.50 (30.3),  4.40 (277.61) | 0.697 | 1.37 |
| IL-6 | 37.3 (53.7),  25.4 (817.47) | 43.7 (64.8),  27.3 (604.99) | 0.127 | 2.33 |
| TNFα | 45.4 (94.4),  25.1 (1188.52) | 53.0 (122),  25.2 (1177.38) | 0.745 | 0.11 |
| **ISI scores** | 4.61 (4.50),  3.00 (26) | 6.94 (5.85),  5.00 (28) | <0.001 | 33.24 |

Note. All data were reported as mean ± SD using Mann–Whitney sum tests and median with IQR.

**Supplementary Table 5.** Odds ratios of insomnia prevalence and corresponding 95% CIs according to tertiles of soy products intake

|  | Soy products Intake | Cases/ | Crude model | | Model 1 | | Model 2 | | Model 3 | |
| --- | --- | --- | --- | --- | --- | --- | --- | --- | --- | --- |
| Participants |
|  |  |  | OR (95%CI) | P value | OR (95%CI) | P value | OR (95%CI) | P value | OR (95%CI) | P value |
| Insomnia | T1(ref) | 149/472 | Reference |  | Reference |  | Reference |  | Reference |  |
|  | T2 | 72/266 | 0.805(0.575 ~1.119) | 0.2 | 0.865(0.609 ~1.221) | 0.413 | 0.976(0.781~1.220) | 0.834 | 0.995(0.791 ~1.250) | 0.965 |
| T3 | 21/139 | 0.386(0.228 ~0.626) | <0.001 | 0.421(0.247 ~0.692) | <0.01 | 0.704(0.509 ~0.963) | 0.030 | 0.714(0.515~0.980) | 0.038 |
| per tertile change of soy | | | 0.672 (0.54 ~0.83) | <0.001 | 0.705 (0.564 ~0.877) | <0.01 | 0.904(0813~1.006) | 0.064 | 0.911(0817 ~1.014) | 0.087 |

Note. Model 1: adjusted for age, gender, BMI.

Model 2: Model 1 plus adjustment for lifestyle factors (current smoke, current drink, seafood intake, milk intake, red meat intake, fruits intake, vegetable intake, salt intake, nuts intake, eggs intake and sugar-sweetened beverage intake).

Model 3: Model 2 plus adjustment for clinical factors (Hypertension, DM, CHD).

**Supplementary Table 6.** Coefficients of scores of ISI and corresponding 95% CIs according to tertiles of soy products intake

|  | Soy products Intake | Cases/ | Crude model | | Model 1 | | Model 2 | | Model 3 | |
| --- | --- | --- | --- | --- | --- | --- | --- | --- | --- | --- |
| Participants |
|  |  |  | β (95%CI) | P value | β (95%CI) | P value | β(95%CI) | P value | β (95%CI) | P value |
| Insomnia | T1(ref) | N=472 | Reference |  | Reference |  | Reference |  | Reference |  |
|  | T2 | N=266 | -0.021(-0.049 ~0.006) | 0.126 | -0.016(-0.044 ~0.012) | 0.253 | -0.008(-0.036 ~0.019) | 0.554 | -0.009(-0.037 ~0.02) | 0.547 |
| T3 | N=139 | -0.065(-0.099 ~-0.03) | <0.001 | -0.058(-0.092 ~-0.023) | <0.01 | -0.038(-0.073 ~-0.003) | 0.033 | -0.036(-0.071 ~-0.001) | 0.043 |
| per tertile change of soy | | | -0.06(-0.093 ~-0.028) | <0.001 | -0.052(-0.085 ~-0.02) | <0.01 | -0.034(-0.067 ~-0.001) | 0.045 | -0.032(-0.066 ~0.001) | 0.056 |

Note. Model 1: adjusted for age, gender, BMI.

Model 2: Model 1 plus adjustment for lifestyle factors (current smoke, current drink, seafood intake, milk intake).

Model 3: Model 2 plus adjustment for clinical factors (Hypertension, DM, CHD)
